# Supplementary material for: Effects of benzoheterocyclic annelation on the s -indacene core: a computational analysis
Source: Royal Society of Chemistry journal article supplement (doi:10.1039/d4sc06812b), 2024-11-18
Supplement: d4sc06812b1.pdf [file d4sc06812b1.pdf]

## Effects of Benzoheterocyclic Annulation on the *s*-Indacene Core: a Computational Analysis

Gabrielle I. Warren,<sup>a,b</sup> Katarzyna Młodzikowska-Pieńko,<sup>b</sup> Said Jalife,<sup>c</sup> Isabella S. Demachkie,<sup>a</sup> Judy I. Wu,<sup>c</sup> Michael M. Haley,<sup>a</sup> and Renana Gershoni-Poranne\*<sup>b</sup>

<sup>a</sup>*Department of Chemistry & Biochemistry and the Materials Science Institute, University of Oregon, Eugene, Oregon 97403, United States*

<sup>b</sup>*Schulich Faculty of Chemistry and the Resnick Sustainability Center for Catalysis, Technion – Israel Institute of Technology, Haifa 32000, Israel*

<sup>c</sup>*Department of Chemistry, University of Houston, Houston, Texas 77204, United States*

|                                          |     |
|------------------------------------------|-----|
| 1. Computational Details .....           | S2  |
| Optimization .....                       | S2  |
| Wavefunction Stability.....              | S2  |
| NICS-Scans.....                          | S3  |
| NICS2BC .....                            | S3  |
| SYSMOIC.....                             | S5  |
| 2. $\pi$ -Density information.....       | S5  |
| 3. Calculated HOMO-LUMO Gaps.....        | S6  |
| 4. Hammett Plots.....                    | S8  |
| 5. Coordinates of optimized dataset..... | S9  |
| 6. References.....                       | S26 |

# 1. Computational Details

## Optimization

All structures were optimized using the following Gaussian<sup>1</sup> input:

```
#n CAM-B3LYP/def2tzvp opt=(MaxCycles=500,Tight) freq=noraman Integral=(UltraFineGrid)
empiricaldispersion=gd3bj

opt

0 1
@compound.xyz
```

where **compound** is the name of the XYZ file.

## Wavefunction Stability

All structures were checked for wavefunction stability according to Gaussian instructions,<sup>2</sup> using the following input:

```
%oldchk=compound
%chk=compoundchk

#n CAM-B3LYP/def2tzvp opt=(MaxCycles=500, Tight) guess=read geom=check stable=opt
Integral=(UltraFineGrid) empiricaldispersion=gd3bj

Checking stability of compound
```

where **%oldchk** is the name of the name of the checkpoint file from the optimization above. If the output file is stable, the original output from the optimization was used. If the wavefunction is not stable, structure was re-optimized based on the stable wavefunction from above:

```
%oldchk=compoundchk
%chk=compoundopt

#n CAM-B3LYP/def2tzvp opt=(MaxCycles=500, Tight) guess=read geom=allcheck freq=noraman
Integral=(UltraFineGrid) empiricaldispersion=gd3bj

Optimizing compound with new wfn
```

where %oldchk is the name of the checkpoint file from the wavefunction stability check above. After successful optimization, the wavefunction stability was checked a final time:

```
%oldchk=compoundopt
%chk=compoundchkfinal

#n CAM-B3LYP/def2tzvp guess=read geom=allcheck stable=opt Integral=(UltraFineGrid)
empiricaldispersion=gd3bj

Checking the re-optimized wfn for stability
```

where %oldchk is the name of the re-optimized checkpoint file. If the final check was stable, the re-optimized structure was used in further calculations.

## NICS-Scans

The general input for NICS values generated by the Aroma package<sup>3-5</sup> is as follows:

```
geomfile=compound
run=nicsscan
center:VALUES
aromatic rings
VALUES
```

where **compound** specifies the optimized Gaussian output, center:**VALUES** specifies the bonds and rings to scan over (as outlined in the Aroma manual), and **VALUES** specifies the aromatic/antiaromatic rings (as outlined in the Aroma manual).

Note: the level of theory for the NICS calculations was changed to CAM-B3LYP/def2tzvp in aroma\_constants.py

All plots and values were generated using the zz components of the chemical shielding tensor, calculated at 1 Å above the molecular plane.

## NICS2BC

To ensure the correct orientation, BC-wizard was used to generate NICS values and then calculate the weights, bond current strengths, and finally to plot the bond currents.<sup>6</sup> The NICS input files were generated using the following:

```
1
1
compound.xyz
7
1
-1
5
1
compound
7
0 1
~
```

where **compound** is the basename of the optimized XYZ coordinates and sets the basename for BC-wizard.

Note: the level of theory for the NICS2BC calculations were changed to CAM-B3LYP/def2tzvp in bcwizard/fileman/gsn\_inp\_header.txt

The Gaussian outputs generated by BC-wizard were run, and then the following commands were used to calculate the ring weights, bond current strengths, and generate a pdf plot:

```
1
5
compound_nics.log
0,0,1
z
n
8
opt
-30.33
z
-1
3
1
z
-1
5
1
compound
5
6
-1
<
```

where **compound** is the basename as specified previously and -30.33 is the NICS value of benzene at 1 Å.

## SYSMOIC

All SYSMOIC<sup>7</sup> inputs (CSGT calculations) were generated following the procedure outlined in the BC-wizard publication using the CAM-B3LYP/def2tzvp level of theory.<sup>6</sup> The SYSMOIC program was the used in the following way:

```
unpackwfx compound
TIPOMO
JBMAP -qf PIG -o compound < jbmap.inp
python plot.py compound.3d
```

where **compound** is the basename of the .wfx file (without .wfx extension) and plot.py is the python code for plotting the current densities from the BC-wizard SI. The jbmap.inp settings are as follows:

```
FATT 15
STEP 0.6
RI -20 -20 1
RF 20 20 1
y
n
n
```

The RI and RF x- and y-axes were set to be large enough to encompass any compound in the dataset and the z-axis value was set to 1 Å.

## 2. $\pi$ -Density information

All the  $\pi$ -density calculations were computed using an Extended Hückel population analysis as implemented in Gaussian16 version C.01,<sup>8</sup> using the input provided below:

```
#ExtendedHuckel pop=full

Population analysis Extended Huckel Calculation

0 1
```

### 3. Calculated HOMO-LUMO Gaps

**Table S1.** Frontier Molecular orbital energies for compounds **1a-1c**, **2a-2c**, **3a-3c** (in eV).

|           | HOMO-1 | HOMO  | LUMO  | LUMO+1 | $E_{\text{Gap}}$ |
|-----------|--------|-------|-------|--------|------------------|
| <b>1a</b> | -6.39  | -5.65 | -0.94 | 0.88   | 4.71             |
| <b>1b</b> | -6.72  | -6.29 | -1.39 | 0.63   | 4.90             |
| <b>1c</b> | -6.98  | -6.56 | -1.91 | 0.37   | 4.64             |
|           |        |       |       |        |                  |
| <b>2a</b> | -6.30  | -6.03 | -1.46 | 0.71   | 4.57             |
| <b>2b</b> | -6.92  | -6.48 | -1.94 | 0.24   | 4.54             |
| <b>2c</b> | -6.77  | -6.66 | -2.01 | -0.01  | 4.65             |
|           |        |       |       |        |                  |
| <b>3a</b> | -6.16  | -6.06 | -1.60 | -0.02  | 4.45             |
| <b>3b</b> | -6.74  | -6.45 | -1.98 | -0.32  | 4.47             |
| <b>3c</b> | -6.63  | -6.50 | -2.13 | -0.32  | 4.36             |

**Table S2.** Frontier Molecular orbital energies for compounds **1d-1f**, **2d-2f**, **3d-3f** (in eV).

|                   | HOMO-1 | HOMO  | LUMO  | LUMO+1 | $E_{\text{Gap}}$ |
|-------------------|--------|-------|-------|--------|------------------|
| <b>1d</b>         | -6.99  | -5.64 | -1.36 | 1.59   | 4.28             |
| <b>1e</b>         | -7.37  | -6.41 | -1.90 | 1.06   | 4.51             |
| <b>1f</b>         | -7.50  | -6.73 | -2.26 | 0.36   | 4.47             |
|                   |        |       |       |        |                  |
| <b>2d</b>         | -6.91  | -6.04 | -1.50 | 1.26   | 4.54             |
| <b>2e</b>         | -6.69  | -6.59 | -2.07 | 0.84   | 4.52             |
| <b>2f</b>         | -6.72  | -6.64 | -2.09 | 0.62   | 4.54             |
|                   |        |       |       |        |                  |
| <b>3d</b>         | -6.49  | -6.01 | -1.95 | 0.79   | 4.06             |
| <b>3e</b>         | -6.86  | -6.54 | -2.38 | 0.49   | 4.16             |
| <b>3f</b>         | -6.81  | -6.52 | -2.35 | 0.31   | 4.17             |
|                   |        |       |       |        |                  |
| <b>s-indacene</b> | -7.14  | -6.87 | -2.06 | 0.56   | 4.80             |

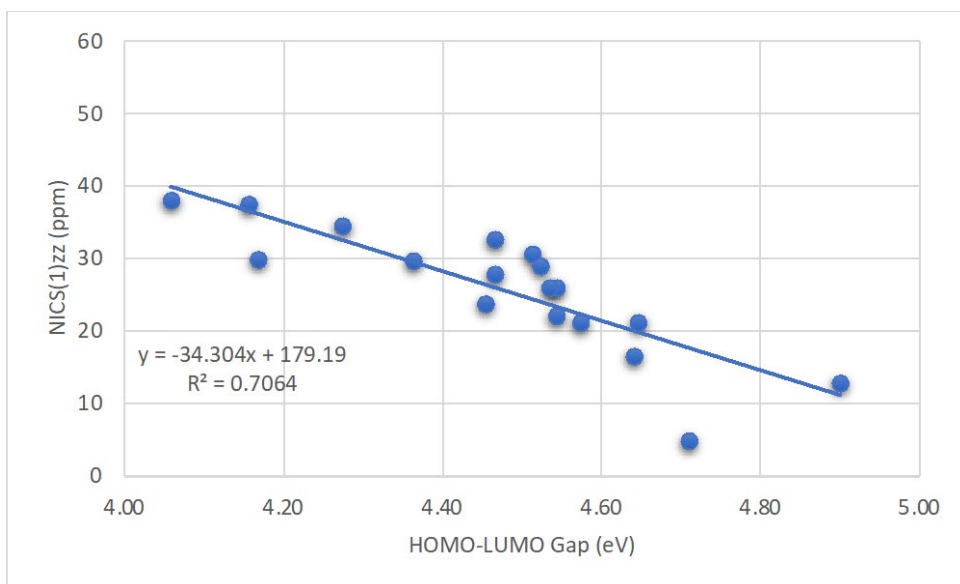

**Figure S1.** Scatter plot of the HOMO-LUMO gap (in eV) of all molecules versus the NICS(1)<sub>zz</sub> value (in ppm) of the 6-membered ring in the s-Indacene core.

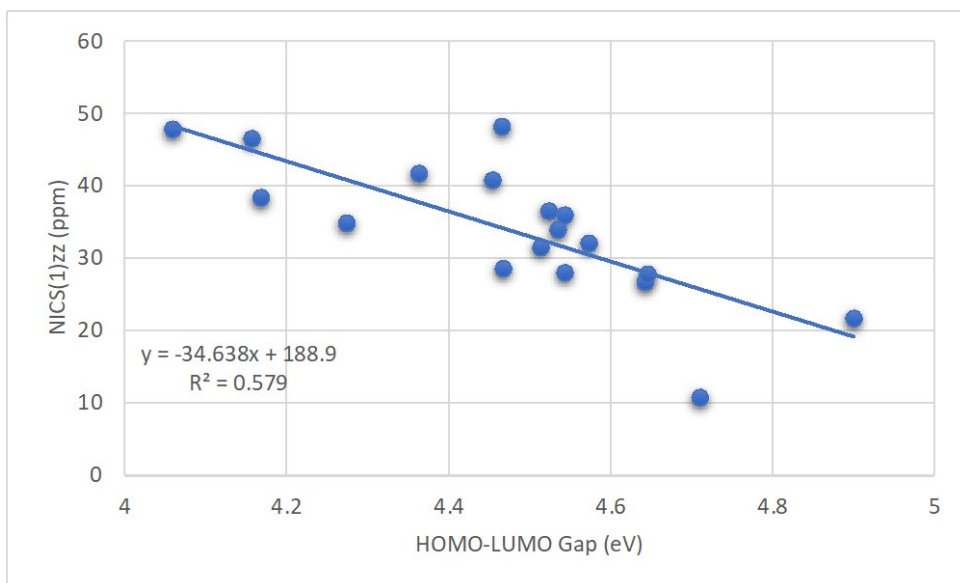

**Figure S2.** Scatter plot of the HOMO-LUMO gap (in eV) of all molecules versus the NICS(1)<sub>zz</sub> value (in ppm) of the 5-membered ring in the s-Indacene core.

## 4. Hammett Plots

The  $\sigma_p$  values for NH<sub>2</sub> (-0.66), OH (-0.37), and SH (0.15)<sup>9</sup> were plotted versus the NICS values for the corresponding acyclic compounds **1a-f**.

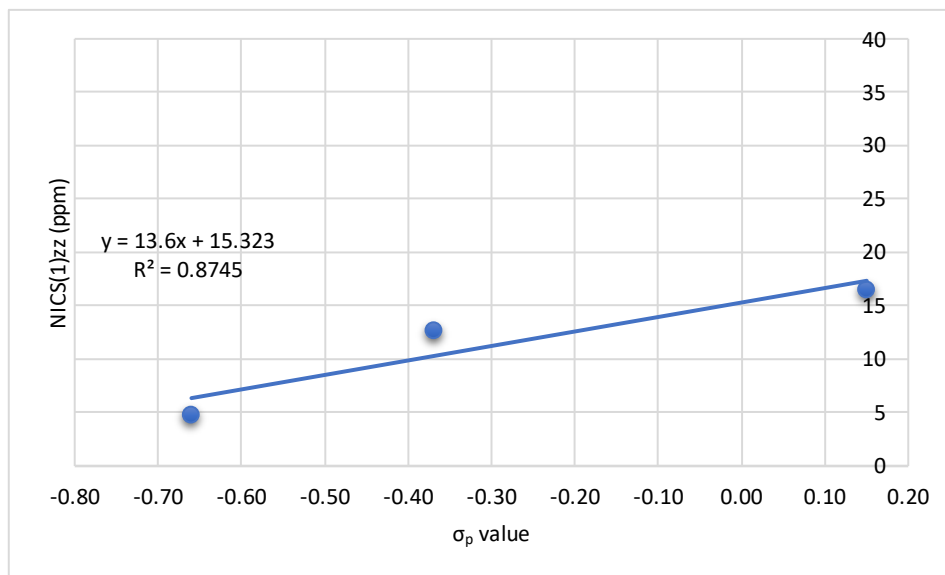

**Figure S3.**  $\sigma_p$  Values for NH<sub>2</sub>, OH, and SH plotted versus the NICS values for **1a-c**.

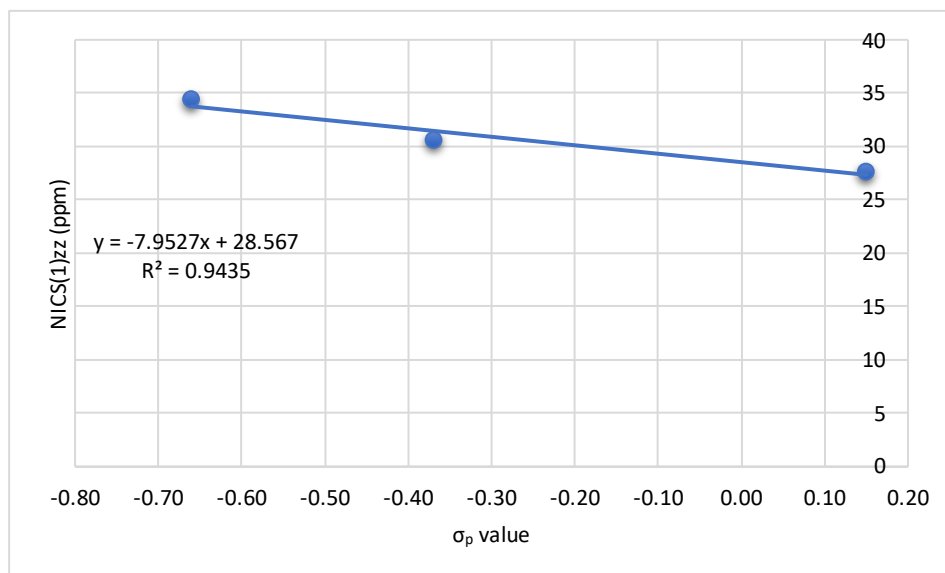

**Figure S4.**  $\sigma_p$  Values for NH<sub>2</sub>, OH, and SH plotted versus the NICS values for **1d-f**.



## 5. Coordinates of optimized dataset

### s-Indacene

Zero-point correction = 0.156531 (Hartree/Particle)

Thermal correction to Energy = 0.164909

Thermal correction to Enthalpy = 0.165853

Thermal correction to Gibbs Free Energy = 0.123342

Sum of electronic and zero-point Energies = -461.777297

Sum of electronic and thermal Energies = -461.768918

Sum of electronic and thermal Enthalpies = -461.767974

Sum of electronic and thermal Free Energies = -461.810485

|   |               |               |              |
|---|---------------|---------------|--------------|
| C | 0.5892700000  | -1.2684440000 | 0.0000000000 |
| C | 1.4231800000  | -0.1925380000 | 0.0000000000 |
| C | 0.8428380000  | 1.1001210000  | 0.0000000000 |
| C | 1.4076740000  | 2.3645950000  | 0.0000000000 |
| C | 0.3566920000  | 3.3423440000  | 0.0000000000 |
| C | -0.8428380000 | 2.6975010000  | 0.0000000000 |
| C | -0.5892700000 | 1.2684440000  | 0.0000000000 |
| C | -1.4231800000 | 0.1925380000  | 0.0000000000 |
| C | -0.8428380000 | -1.1001210000 | 0.0000000000 |
| C | -1.4076740000 | -2.3645950000 | 0.0000000000 |
| C | -0.3566920000 | -3.3423440000 | 0.0000000000 |
| C | 0.8428380000  | -2.6975010000 | 0.0000000000 |
| H | 2.5007420000  | -0.3097330000 | 0.0000000000 |
| H | 2.4654630000  | 2.5849440000  | 0.0000000000 |
| H | 0.5058320000  | 4.4105870000  | 0.0000000000 |
| H | -1.8201420000 | 3.1557820000  | 0.0000000000 |
| H | -2.5007420000 | 0.3097330000  | 0.0000000000 |
| H | -2.4654630000 | -2.5849440000 | 0.0000000000 |
| H | -0.5058320000 | -4.4105870000 | 0.0000000000 |
| H | 1.8201420000  | -3.1557820000 | 0.0000000000 |

### 1a; anti-NH2

Zero-point correction = 0.191128 (Hartree/Particle)

Thermal correction to Energy = 0.202362

Thermal correction to Enthalpy = 0.203307

Thermal correction to Gibbs Free Energy = 0.155001

Sum of electronic and zero-point Energies = -572.483421

Sum of electronic and thermal Energies = -572.472187

Sum of electronic and thermal Enthalpies = -572.471243

Sum of electronic and thermal Free Energies = -572.519548

|   |              |              |               |
|---|--------------|--------------|---------------|
| N | 3.5789190000 | 1.4015910000 | -0.0282550000 |
| C | 2.7671850000 | 0.3092590000 | 0.0009090000  |

|   |               |               |               |
|---|---------------|---------------|---------------|
| C | 3.2022430000  | -1.0439980000 | -0.0071630000 |
| C | 2.0988590000  | -1.8622280000 | -0.0097480000 |
| C | 0.9180440000  | -1.0463460000 | -0.0047690000 |
| C | 1.3460860000  | 0.3238590000  | -0.0020230000 |
| C | 0.4219490000  | 1.3661920000  | -0.0053590000 |
| C | -0.9180430000 | 1.0463460000  | -0.0047690000 |
| C | -2.0988580000 | 1.8622280000  | -0.0097480000 |
| C | -3.2022430000 | 1.0439980000  | -0.0071630000 |
| C | -2.7671850000 | -0.3092590000 | 0.0009090000  |
| N | -3.5789190000 | -1.4015910000 | -0.0282550000 |
| C | -1.3460860000 | -0.3238590000 | -0.0020230000 |
| C | -0.4219480000 | -1.3661920000 | -0.0053590000 |
| H | 4.5509400000  | 1.2806080000  | 0.1935270000  |
| H | 3.1899370000  | 2.2957380000  | 0.2125690000  |
| H | 4.2345960000  | -1.3600880000 | -0.0118640000 |
| H | 2.1110220000  | -2.9417100000 | -0.0129860000 |
| H | 0.7358810000  | 2.4046320000  | -0.0145420000 |
| H | -2.1110210000 | 2.9417100000  | -0.0129860000 |
| H | -4.2345960000 | 1.3600890000  | -0.0118650000 |
| H | -4.5509400000 | -1.2806070000 | 0.1935260000  |
| H | -3.1899380000 | -2.2957380000 | 0.2125680000  |
| H | -0.7358810000 | -2.4046320000 | -0.0145430000 |

### 1b; anti-OH

|                                              |                             |
|----------------------------------------------|-----------------------------|
| Zero-point correction=                       | 0.166522 (Hartree/Particle) |
| Thermal correction to Energy=                | 0.176988                    |
| Thermal correction to Enthalpy=              | 0.177932                    |
| Thermal correction to Gibbs Free Energy=     | 0.130843                    |
| Sum of electronic and zero-point Energies=   | -612.252596                 |
| Sum of electronic and thermal Energies=      | -612.242130                 |
| Sum of electronic and thermal Enthalpies=    | -612.241186                 |
| Sum of electronic and thermal Free Energies= | -612.288275                 |

|   |               |               |               |
|---|---------------|---------------|---------------|
| O | -3.4779190000 | -1.4698850000 | -0.0000010000 |
| C | -2.7469400000 | -0.3453900000 | 0.0000000000  |
| C | -3.2213010000 | 0.9868800000  | -0.0000050000 |
| C | -2.1289780000 | 1.8269860000  | 0.0000060000  |
| C | -0.9335160000 | 1.0325160000  | 0.0000010000  |
| C | -1.3336080000 | -0.3448350000 | 0.0000000000  |
| C | -0.4000870000 | -1.3784220000 | 0.0000000000  |
| C | 0.9335160000  | -1.0325160000 | 0.0000010000  |
| C | 2.1289780000  | -1.8269860000 | 0.0000060000  |
| C | 3.2213010000  | -0.9868800000 | -0.0000040000 |
| C | 2.7469400000  | 0.3453900000  | 0.0000000000  |
| O | 3.4779190000  | 1.4698850000  | -0.0000010000 |

|   |               |               |               |
|---|---------------|---------------|---------------|
| C | 1.3336080000  | 0.3448350000  | 0.0000000000  |
| C | 0.4000860000  | 1.3784220000  | 0.0000000000  |
| H | -4.4164020000 | -1.2551550000 | -0.0000040000 |
| H | -4.2601910000 | 1.2813880000  | -0.0000090000 |
| H | -2.1602290000 | 2.9059340000  | 0.0000090000  |
| H | -0.7167660000 | -2.4141490000 | 0.0000010000  |
| H | 2.1602290000  | -2.9059340000 | 0.0000080000  |
| H | 4.2601910000  | -1.2813880000 | -0.0000090000 |
| H | 4.4164030000  | 1.2551550000  | -0.0000040000 |
| H | 0.7167660000  | 2.4141490000  | 0.0000010000  |

**1c; anti-SH**

|                                              |                             |
|----------------------------------------------|-----------------------------|
| Zero-point correction=                       | 0.155933 (Hartree/Particle) |
| Thermal correction to Energy=                | 0.167855                    |
| Thermal correction to Enthalpy=              | 0.168800                    |
| Thermal correction to Gibbs Free Energy=     | 0.117499                    |
| Sum of electronic and zero-point Energies=   | -1258.227851                |
| Sum of electronic and thermal Energies=      | -1258.215929                |
| Sum of electronic and thermal Enthalpies=    | -1258.214985                |
| Sum of electronic and thermal Free Energies= | -1258.266285                |

|   |               |               |               |
|---|---------------|---------------|---------------|
| S | 4.1042410000  | 0.8912760000  | -0.0000010000 |
| C | 2.7757570000  | -0.2088380000 | -0.0000010000 |
| C | 2.9540010000  | -1.6224330000 | -0.0000020000 |
| C | 1.7230750000  | -2.2194370000 | 0.0000010000  |
| C | 0.7112460000  | -1.1925250000 | 0.0000010000  |
| C | 1.3840970000  | 0.0709120000  | 0.0000010000  |
| C | 0.6620150000  | 1.2652580000  | 0.0000010000  |
| C | -0.7112460000 | 1.1925250000  | 0.0000010000  |
| C | -1.7230750000 | 2.2194370000  | 0.0000010000  |
| C | -2.9540020000 | 1.6224330000  | -0.0000020000 |
| C | -2.7757570000 | 0.2088380000  | 0.0000000000  |
| S | -4.1042410000 | -0.8912760000 | -0.0000010000 |
| C | -1.3840970000 | -0.0709120000 | 0.0000010000  |
| C | -0.6620150000 | -1.2652580000 | 0.0000010000  |
| H | 3.3938650000  | 2.0255210000  | 0.0000030000  |
| H | 3.9097170000  | -2.1225680000 | -0.0000030000 |
| H | 1.5329310000  | -3.2819910000 | 0.0000030000  |
| H | 1.1580950000  | 2.2289050000  | 0.0000010000  |
| H | -1.5329310000 | 3.2819910000  | 0.0000030000  |
| H | -3.9097170000 | 2.1225680000  | -0.0000030000 |
| H | -3.3938650000 | -2.0255210000 | 0.0000030000  |
| H | -1.1580950000 | -2.2289050000 | 0.0000010000  |

**1d; syn-NH2**

Zero-point correction= 0.190615 (Hartree/Particle)  
Thermal correction to Energy= 0.201225  
Thermal correction to Enthalpy= 0.202169  
Thermal correction to Gibbs Free Energy= 0.154729  
Sum of electronic and zero-point Energies= -572.465620  
Sum of electronic and thermal Energies= -572.455010  
Sum of electronic and thermal Enthalpies= -572.454066  
Sum of electronic and thermal Free Energies= -572.501505

|   |               |               |               |
|---|---------------|---------------|---------------|
| N | 4.7078810000  | 0.0835880000  | -0.0000060000 |
| C | 3.3529830000  | -0.0511820000 | -0.0000010000 |
| C | 2.5989070000  | -1.1769880000 | 0.0000000000  |
| C | 1.2045600000  | -0.7647790000 | 0.0000000000  |
| C | 0.0510550000  | -1.4497320000 | 0.0000000000  |
| C | -1.1900010000 | -0.7115110000 | 0.0000000000  |
| C | -2.4689440000 | -1.1301570000 | 0.0000010000  |
| C | -3.3529830000 | 0.0511820000  | 0.0000000000  |
| N | -4.7078810000 | -0.0835880000 | 0.0000020000  |
| C | -2.5989070000 | 1.1769880000  | 0.0000000000  |
| C | -1.2045600000 | 0.7647790000  | 0.0000000000  |
| C | -0.0510550000 | 1.4497320000  | 0.0000000000  |
| C | 1.1900010000  | 0.7115110000  | 0.0000000000  |
| C | 2.4689440000  | 1.1301570000  | -0.0000010000 |
| H | 5.3067650000  | -0.7190900000 | 0.0000190000  |
| H | 5.1329200000  | 0.9893260000  | 0.0000280000  |
| H | 2.9526580000  | -2.1955240000 | 0.0000000000  |
| H | 0.0275040000  | -2.5328360000 | 0.0000000000  |
| H | -2.8174090000 | -2.1537530000 | 0.0000010000  |
| H | -5.1329200000 | -0.9893260000 | -0.0000090000 |
| H | -5.3067650000 | 0.7190900000  | -0.0000060000 |
| H | -2.9526580000 | 2.1955240000  | 0.0000010000  |
| H | -0.0275040000 | 2.5328360000  | 0.0000000000  |
| H | 2.8174090000  | 2.1537530000  | -0.0000020000 |

**1e; syn-OH**

Zero-point correction= 0.167977 (Hartree/Particle)  
Thermal correction to Energy= 0.178395  
Thermal correction to Enthalpy= 0.179339  
Thermal correction to Gibbs Free Energy= 0.132241  
Sum of electronic and zero-point Energies= -612.240323  
Sum of electronic and thermal Energies= -612.229905  
Sum of electronic and thermal Enthalpies= -612.228960  
Sum of electronic and thermal Free Energies= -612.276059

|   |              |              |             |
|---|--------------|--------------|-------------|
| O | 4.675130000  | -0.162453000 | 0.000000000 |
| C | 3.338551000  | 0.016401000  | 0.000000000 |
| C | 2.609766000  | 1.150799000  | 0.000000000 |
| C | 1.207697000  | 0.746307000  | 0.000000000 |
| C | 0.064380000  | 1.447273000  | 0.000000000 |
| C | -1.184090000 | 0.723707000  | 0.000000000 |
| C | -2.462097000 | 1.156699000  | 0.000000000 |
| C | -3.338552000 | -0.016405000 | 0.000000000 |
| O | -4.675131000 | 0.162443000  | 0.000000000 |
| C | -2.609762000 | -1.150797000 | 0.000000000 |
| C | -1.207696000 | -0.746302000 | 0.000000000 |
| C | -0.064380000 | -1.447268000 | 0.000000000 |
| C | 1.184088000  | -0.723703000 | 0.000000000 |
| C | 2.462093000  | -1.156697000 | 0.000000000 |
| H | 5.119457000  | 0.691589000  | 0.000002000 |
| H | 2.974083000  | 2.166102000  | 0.000000000 |
| H | 0.054472000  | 2.530493000  | 0.000000000 |
| H | -2.817543000 | 2.176090000  | 0.000000000 |
| H | -5.119453000 | -0.691602000 | 0.000002000 |
| H | -2.974074000 | -2.166103000 | 0.000000000 |
| H | -0.054469000 | -2.530487000 | 0.000000000 |
| H | 2.817535000  | -2.176090000 | 0.000000000 |

### 1f; *syn*-SH

|                                              |                             |
|----------------------------------------------|-----------------------------|
| Zero-point correction=                       | 0.157290 (Hartree/Particle) |
| Thermal correction to Energy=                | 0.169335                    |
| Thermal correction to Enthalpy=              | 0.170279                    |
| Thermal correction to Gibbs Free Energy=     | 0.118437                    |
| Sum of electronic and zero-point Energies=   | -1258.213853                |
| Sum of electronic and thermal Energies=      | -1258.201808                |
| Sum of electronic and thermal Enthalpies=    | -1258.200864                |
| Sum of electronic and thermal Free Energies= | -1258.252706                |

|   |              |              |              |
|---|--------------|--------------|--------------|
| S | -5.098033000 | -0.023133000 | -0.081588000 |
| C | -3.351935000 | -0.061747000 | 0.021049000  |
| C | -2.586583000 | -1.175385000 | 0.025245000  |
| C | -1.193270000 | -0.754754000 | 0.016423000  |
| C | -0.040191000 | -1.446834000 | 0.014950000  |
| C | 1.194156000  | -0.707831000 | 0.016443000  |
| C | 2.484276000  | -1.118402000 | 0.011552000  |
| C | 3.351935000  | 0.061747000  | 0.021049000  |
| S | 5.098033000  | 0.023133000  | -0.081588000 |
| C | 2.586584000  | 1.175385000  | 0.025245000  |
| C | 1.193270000  | 0.754754000  | 0.016423000  |
| C | 0.040191000  | 1.446834000  | 0.014950000  |

|   |               |               |               |
|---|---------------|---------------|---------------|
| C | -1.1941560000 | 0.7078310000  | 0.0164430000  |
| C | -2.4842760000 | 1.1184020000  | 0.0115520000  |
| H | -5.2769320000 | 1.1005150000  | 0.6254980000  |
| H | -2.9344500000 | -2.1960940000 | 0.0396220000  |
| H | -0.0217330000 | -2.5300260000 | 0.0108790000  |
| H | 2.8399800000  | -2.1382820000 | -0.0045610000 |
| H | 5.2769320000  | -1.1005150000 | 0.6254970000  |
| H | 2.9344500000  | 2.1960940000  | 0.0396220000  |
| H | 0.0217330000  | 2.5300260000  | 0.0108790000  |
| H | -2.8399800000 | 2.1382820000  | -0.0045610000 |

**2a; anti-IDP**

|                                              |                             |
|----------------------------------------------|-----------------------------|
| Zero-point correction=                       | 0.218650 (Hartree/Particle) |
| Thermal correction to Energy=                | 0.230825                    |
| Thermal correction to Enthalpy=              | 0.231769                    |
| Thermal correction to Gibbs Free Energy=     | 0.180244                    |
| Sum of electronic and zero-point Energies=   | -724.829177                 |
| Sum of electronic and thermal Energies=      | -724.817002                 |
| Sum of electronic and thermal Enthalpies=    | -724.816057                 |
| Sum of electronic and thermal Free Energies= | -724.867583                 |

|   |               |               |              |
|---|---------------|---------------|--------------|
| C | 1.3379550000  | 0.4370520000  | 0.0000000000 |
| C | 0.3884380000  | 1.3916450000  | 0.0000000000 |
| C | -0.9868190000 | 0.9962790000  | 0.0000000000 |
| C | -2.1261270000 | 1.7484040000  | 0.0000000000 |
| C | -3.2669590000 | 0.8556890000  | 0.0000000000 |
| C | -2.7866350000 | -0.4408540000 | 0.0000000000 |
| N | -3.8416280000 | -1.2913980000 | 0.0000000000 |
| C | -5.0043740000 | -0.5481480000 | 0.0000000000 |
| C | -4.6840020000 | 0.7848850000  | 0.0000000000 |
| C | -1.3379550000 | -0.4370520000 | 0.0000000000 |
| C | -0.3884380000 | -1.3916450000 | 0.0000000000 |
| C | 0.9868190000  | -0.9962780000 | 0.0000000000 |
| C | 2.1261270000  | -1.7484040000 | 0.0000000000 |
| C | 3.2669590000  | -0.8556890000 | 0.0000000000 |
| C | 2.7866350000  | 0.4408540000  | 0.0000000000 |
| N | 3.8416280000  | 1.2913980000  | 0.0000000000 |
| C | 5.0043740000  | 0.5481480000  | 0.0000000000 |
| C | 4.6840020000  | -0.7848850000 | 0.0000000000 |
| H | 0.6364390000  | 2.4469490000  | 0.0000000000 |
| H | -2.1621350000 | 2.8281220000  | 0.0000000000 |
| H | -3.8024090000 | -2.2938450000 | 0.0000000000 |
| H | -5.9651800000 | -1.0327700000 | 0.0000000000 |
| H | -5.3943420000 | 1.5943260000  | 0.0000000000 |
| H | -0.6364400000 | -2.4469490000 | 0.0000000000 |

|   |              |               |              |
|---|--------------|---------------|--------------|
| H | 2.1621350000 | -2.8281230000 | 0.0000000000 |
| H | 3.8024090000 | 2.2938450000  | 0.0000000000 |
| H | 5.9651800000 | 1.0327700000  | 0.0000000000 |
| H | 5.3943420000 | -1.5943260000 | 0.0000000000 |

**2b; anti-IDF**

|                                              |                             |
|----------------------------------------------|-----------------------------|
| Zero-point correction=                       | 0.193699 (Hartree/Particle) |
| Thermal correction to Energy=                | 0.205296                    |
| Thermal correction to Enthalpy=              | 0.206240                    |
| Thermal correction to Gibbs Free Energy=     | 0.155602                    |
| Sum of electronic and zero-point Energies=   | -764.575045                 |
| Sum of electronic and thermal Energies=      | -764.563448                 |
| Sum of electronic and thermal Enthalpies=    | -764.562504                 |
| Sum of electronic and thermal Free Energies= | -764.613142                 |

|   |               |               |               |
|---|---------------|---------------|---------------|
| C | -1.3339590000 | -0.4327080000 | -0.0000010000 |
| C | -0.3910180000 | -1.3944700000 | -0.0000010000 |
| C | 0.9834260000  | -0.9995150000 | -0.0000020000 |
| C | 2.1221410000  | -1.7564470000 | -0.0000030000 |
| C | 3.2594290000  | -0.8583390000 | 0.0000000000  |
| C | 2.7757470000  | 0.4184790000  | -0.0000020000 |
| O | 3.7592450000  | 1.3272970000  | 0.0000020000  |
| C | 4.9249680000  | 0.6012340000  | -0.0000100000 |
| C | 4.6824460000  | -0.7310640000 | 0.0000140000  |
| C | 1.3339590000  | 0.4327080000  | -0.0000010000 |
| C | 0.3910180000  | 1.3944700000  | 0.0000000000  |
| C | -0.9834260000 | 0.9995150000  | -0.0000010000 |
| C | -2.1221410000 | 1.7564470000  | -0.0000030000 |
| C | -3.2594290000 | 0.8583390000  | 0.0000000000  |
| C | -2.7757470000 | -0.4184790000 | -0.0000010000 |
| O | -3.7592450000 | -1.3272970000 | 0.0000020000  |
| C | -4.9249680000 | -0.6012340000 | -0.0000090000 |
| C | -4.6824460000 | 0.7310640000  | 0.0000130000  |
| H | -0.6512620000 | -2.4458780000 | -0.0000010000 |
| H | 2.1570420000  | -2.8357050000 | -0.0000010000 |
| H | 5.8301530000  | 1.1809240000  | -0.0000190000 |
| H | 5.4340660000  | -1.5019270000 | 0.0000250000  |
| H | 0.6512620000  | 2.4458780000  | 0.0000000000  |
| H | -2.1570420000 | 2.8357050000  | -0.0000010000 |
| H | -5.8301530000 | -1.1809240000 | -0.0000160000 |
| H | -5.4340660000 | 1.5019270000  | 0.0000220000  |

**2c; anti-IDT**

|                        |                             |
|------------------------|-----------------------------|
| Zero-point correction= | 0.187659 (Hartree/Particle) |
|------------------------|-----------------------------|

Thermal correction to Energy= 0.200194  
 Thermal correction to Enthalpy= 0.201138  
 Thermal correction to Gibbs Free Energy= 0.148021  
 Sum of electronic and zero-point Energies= -1410.596776  
 Sum of electronic and thermal Energies= -1410.584241  
 Sum of electronic and thermal Enthalpies= -1410.583297  
 Sum of electronic and thermal Free Energies= -1410.636415

|   |               |               |               |
|---|---------------|---------------|---------------|
| C | -1.3653190000 | -0.3401970000 | 0.0000000000  |
| C | -0.4896040000 | -1.3613330000 | 0.0000000000  |
| C | 0.9116890000  | -1.0595790000 | 0.0000000000  |
| C | 1.9957920000  | -1.8826060000 | 0.0000000000  |
| C | 3.1960700000  | -1.0651270000 | 0.0000000000  |
| C | 2.8145270000  | 0.2620830000  | 0.0000000000  |
| S | 4.1567980000  | 1.3039280000  | -0.0000010000 |
| C | 5.2450130000  | -0.0326770000 | 0.0000010000  |
| C | 4.6032370000  | -1.2320450000 | 0.0000000000  |
| C | 1.3653190000  | 0.3401970000  | 0.0000000000  |
| C | 0.4896040000  | 1.3613330000  | 0.0000000000  |
| C | -0.9116890000 | 1.0595790000  | 0.0000000000  |
| C | -1.9957920000 | 1.8826060000  | 0.0000000000  |
| C | -3.1960700000 | 1.0651270000  | 0.0000000000  |
| C | -2.8145270000 | -0.2620830000 | 0.0000000000  |
| S | -4.1567980000 | -1.3039280000 | -0.0000010000 |
| C | -5.2450130000 | 0.0326770000  | 0.0000020000  |
| C | -4.6032370000 | 1.2320460000  | 0.0000000000  |
| H | -0.8159200000 | -2.3944090000 | 0.0000000000  |
| H | 1.9700090000  | -2.9624560000 | 0.0000000000  |
| H | 6.3070420000  | 0.1478770000  | 0.0000020000  |
| H | 5.1195570000  | -2.1804280000 | 0.0000000000  |
| H | 0.8159200000  | 2.3944090000  | 0.0000000000  |
| H | -1.9700090000 | 2.9624560000  | 0.0000000000  |
| H | -6.3070420000 | -0.1478770000 | 0.0000030000  |
| H | -5.1195570000 | 2.1804280000  | 0.0000000000  |

## 2d; *syn*-IDP

Zero-point correction= 0.218703 (Hartree/Particle)  
 Thermal correction to Energy= 0.230878  
 Thermal correction to Enthalpy= 0.231822  
 Thermal correction to Gibbs Free Energy= 0.180314  
 Sum of electronic and zero-point Energies= -724.830834  
 Sum of electronic and thermal Energies= -724.818659  
 Sum of electronic and thermal Enthalpies= -724.817715  
 Sum of electronic and thermal Free Energies= -724.869223



|   |               |               |               |
|---|---------------|---------------|---------------|
| C | -1.3355930000 | -0.4688090000 | -0.0000020000 |
| C | -0.3638070000 | -1.3975840000 | -0.0000030000 |
| C | 1.0048660000  | -0.9677870000 | -0.0000020000 |
| C | 2.1559810000  | -1.7029270000 | -0.0000010000 |
| C | 3.2505140000  | -0.7672800000 | 0.0000000000  |
| C | 2.7940410000  | 0.5369930000  | 0.0000000000  |
| C | 3.9244050000  | 1.3824890000  | 0.0000040000  |
| C | 5.0275580000  | 0.5590740000  | 0.0000010000  |
| N | 4.6120220000  | -0.7502440000 | 0.0000030000  |
| C | 1.3355930000  | 0.4688090000  | -0.0000010000 |
| C | 0.3638070000  | 1.3975840000  | -0.0000020000 |
| C | -1.0048660000 | 0.9677870000  | -0.0000020000 |
| C | -2.1559810000 | 1.7029270000  | -0.0000020000 |
| C | -3.2505140000 | 0.7672800000  | -0.0000010000 |
| C | -2.7940410000 | -0.5369930000 | -0.0000020000 |
| C | -3.9244050000 | -1.3824890000 | -0.0000020000 |
| C | -5.0275580000 | -0.5590740000 | 0.0000100000  |
| N | -4.6120220000 | 0.7502440000  | -0.0000010000 |
| H | -0.5918800000 | -2.4569040000 | -0.0000030000 |
| H | 2.2204960000  | -2.7809200000 | -0.0000010000 |
| H | 3.9569240000  | 2.4590130000  | 0.0000060000  |
| H | 6.0753610000  | 0.8048590000  | 0.0000000000  |
| H | 5.2214580000  | -1.5469030000 | 0.0000040000  |
| H | 0.5918800000  | 2.4569040000  | -0.0000020000 |
| H | -2.2204960000 | 2.7809200000  | -0.0000020000 |
| H | -3.9569240000 | -2.4590130000 | -0.0000040000 |
| H | -6.0753610000 | -0.8048590000 | 0.0000180000  |
| H | -5.2214580000 | 1.5469030000  | 0.0000000000  |

## 2e; *syn-IDF*

|                                              |                             |
|----------------------------------------------|-----------------------------|
| Zero-point correction=                       | 0.193697 (Hartree/Particle) |
| Thermal correction to Energy=                | 0.205294                    |
| Thermal correction to Enthalpy=              | 0.206238                    |
| Thermal correction to Gibbs Free Energy=     | 0.155592                    |
| Sum of electronic and zero-point Energies=   | -764.578360                 |
| Sum of electronic and thermal Energies=      | -764.566763                 |
| Sum of electronic and thermal Enthalpies=    | -764.565819                 |
| Sum of electronic and thermal Free Energies= | -764.616465                 |

|   |               |               |               |
|---|---------------|---------------|---------------|
| C | -1.3311230000 | -0.4744190000 | 0.0000000000  |
| C | -0.3552620000 | -1.3999500000 | 0.0000010000  |
| C | 1.0098740000  | -0.9633770000 | 0.0000000000  |
| C | 2.1654970000  | -1.6965410000 | -0.0000010000 |
| C | 3.2359470000  | -0.7428790000 | -0.0000010000 |
| C | 2.7880490000  | 0.5465030000  | -0.0000010000 |

|   |               |               |               |
|---|---------------|---------------|---------------|
| C | 3.9537130000  | 1.3603950000  | 0.0000030000  |
| C | 4.9998670000  | 0.4929030000  | -0.0000020000 |
| O | 4.5805610000  | -0.8063250000 | 0.0000010000  |
| C | 1.3311230000  | 0.4744190000  | -0.0000010000 |
| C | 0.3552620000  | 1.3999500000  | -0.0000010000 |
| C | -1.0098740000 | 0.9633770000  | 0.0000000000  |
| C | -2.1654970000 | 1.6965410000  | 0.0000010000  |
| C | -3.2359470000 | 0.7428790000  | 0.0000000000  |
| C | -2.7880490000 | -0.5465030000 | 0.0000010000  |
| C | -3.9537130000 | -1.3603950000 | 0.0000030000  |
| C | -4.9998670000 | -0.4929030000 | -0.0000040000 |
| O | -4.5805610000 | 0.8063250000  | 0.0000010000  |
| H | -0.5778980000 | -2.4601750000 | 0.0000010000  |
| H | 2.2497200000  | -2.7720330000 | -0.0000010000 |
| H | 4.0356510000  | 2.4339320000  | 0.0000050000  |
| H | 6.0652540000  | 0.6380300000  | -0.0000030000 |
| H | 0.5778980000  | 2.4601750000  | -0.0000010000 |
| H | -2.2497200000 | 2.7720330000  | 0.0000010000  |
| H | -4.0356510000 | -2.4339320000 | 0.0000050000  |
| H | -6.0652540000 | -0.6380300000 | -0.0000060000 |

## 2f; *syn*-IDT

|                                              |                             |
|----------------------------------------------|-----------------------------|
| Zero-point correction=                       | 0.187688 (Hartree/Particle) |
| Thermal correction to Energy=                | 0.200215                    |
| Thermal correction to Enthalpy=              | 0.201159                    |
| Thermal correction to Gibbs Free Energy=     | 0.148074                    |
| Sum of electronic and zero-point Energies=   | -1410.597962                |
| Sum of electronic and thermal Energies=      | -1410.585436                |
| Sum of electronic and thermal Enthalpies=    | -1410.584491                |
| Sum of electronic and thermal Free Energies= | -1410.637577                |

|   |               |               |               |
|---|---------------|---------------|---------------|
| C | 1.3203520000  | -0.4926970000 | 0.0000000000  |
| C | 0.3326720000  | -1.4062090000 | 0.0000010000  |
| C | -1.0246340000 | -0.9447790000 | 0.0000010000  |
| C | -2.1963010000 | -1.6441310000 | 0.0000020000  |
| C | -3.2755720000 | -0.6876770000 | 0.0000010000  |
| C | -2.7758490000 | 0.6006420000  | 0.0000000000  |
| C | -3.7902110000 | 1.5812100000  | -0.0000010000 |
| C | -5.0312350000 | 1.0145690000  | -0.0000010000 |
| S | -4.9812790000 | -0.7038970000 | 0.0000000000  |
| C | -1.3203520000 | 0.4926970000  | 0.0000000000  |
| C | -0.3326720000 | 1.4062090000  | 0.0000000000  |
| C | 1.0246340000  | 0.9447790000  | -0.0000010000 |
| C | 2.1963010000  | 1.6441310000  | -0.0000010000 |
| C | 3.2755720000  | 0.6876770000  | 0.0000000000  |

|   |               |               |               |
|---|---------------|---------------|---------------|
| C | 2.7758490000  | -0.6006420000 | 0.0000000000  |
| C | 3.7902110000  | -1.5812100000 | 0.0000000000  |
| C | 5.0312350000  | -1.0145690000 | -0.0000070000 |
| S | 4.9812790000  | 0.7038970000  | 0.0000030000  |
| H | 0.5388550000  | -2.4698060000 | 0.0000020000  |
| H | -2.2977000000 | -2.7188240000 | 0.0000020000  |
| H | -3.6301070000 | 2.6491050000  | -0.0000020000 |
| H | -5.9830140000 | 1.5193690000  | -0.0000020000 |
| H | -0.5388550000 | 2.4698060000  | 0.0000000000  |
| H | 2.2977000000  | 2.7188240000  | -0.0000010000 |
| H | 3.6301070000  | -2.6491050000 | 0.0000000000  |
| H | 5.9830140000  | -1.5193690000 | -0.0000110000 |

### 3a; anti-IDI

|                                              |                             |
|----------------------------------------------|-----------------------------|
| Zero-point correction=                       | 0.311542 (Hartree/Particle) |
| Thermal correction to Energy=                | 0.329140                    |
| Thermal correction to Enthalpy=              | 0.330085                    |
| Thermal correction to Gibbs Free Energy=     | 0.266294                    |
| Sum of electronic and zero-point Energies=   | -1031.988801                |
| Sum of electronic and thermal Energies=      | -1031.971203                |
| Sum of electronic and thermal Enthalpies=    | -1031.970258                |
| Sum of electronic and thermal Free Energies= | -1032.034049                |

|   |               |               |               |
|---|---------------|---------------|---------------|
| N | -3.7268790000 | -1.4734030000 | 0.0000000000  |
| C | -4.9557930000 | -0.8149110000 | 0.0000020000  |
| C | -4.7238520000 | 0.5805830000  | 0.0000000000  |
| C | -5.8155800000 | 1.4396960000  | 0.0000000000  |
| C | -7.0922890000 | 0.9092110000  | 0.0000020000  |
| C | -7.2978440000 | -0.4693080000 | 0.0000030000  |
| C | -6.2302620000 | -1.3496340000 | 0.0000030000  |
| C | -2.7378460000 | -0.5441050000 | -0.0000010000 |
| C | -3.2933300000 | 0.7435150000  | 0.0000000000  |
| C | -2.2413490000 | 1.6741290000  | -0.0000010000 |
| C | -1.0219810000 | 0.9538200000  | 0.0000000000  |
| C | -1.3079740000 | -0.4659920000 | -0.0000020000 |
| C | -0.2996840000 | -1.4010740000 | -0.0000030000 |
| C | 1.0219820000  | -0.9538200000 | -0.0000040000 |
| C | 2.2413490000  | -1.6741290000 | -0.0000080000 |
| C | 3.2933300000  | -0.7435150000 | -0.0000030000 |
| C | 2.7378460000  | 0.5441050000  | -0.0000020000 |
| N | 3.7268790000  | 1.4734030000  | -0.0000020000 |
| C | 4.9557930000  | 0.8149110000  | -0.0000010000 |
| C | 4.7238520000  | -0.5805830000 | 0.0000020000  |
| C | 5.8155810000  | -1.4396950000 | 0.0000060000  |
| C | 7.0922890000  | -0.9092110000 | 0.0000060000  |

|   |               |               |               |
|---|---------------|---------------|---------------|
| C | 7.2978440000  | 0.4693080000  | 0.0000030000  |
| C | 6.2302620000  | 1.3496340000  | 0.0000000000  |
| C | 1.3079740000  | 0.4659910000  | -0.0000020000 |
| C | 0.2996840000  | 1.4010740000  | 0.0000010000  |
| H | -5.6682370000 | 2.5116120000  | 0.0000000000  |
| H | -7.9467350000 | 1.5724340000  | 0.0000020000  |
| H | -8.3069480000 | -0.8584720000 | 0.0000040000  |
| H | -6.3912910000 | -2.4199480000 | 0.0000040000  |
| H | -2.3259520000 | 2.7504220000  | -0.0000010000 |
| H | -0.5134130000 | -2.4638450000 | -0.0000050000 |
| H | 2.3259520000  | -2.7504220000 | -0.0000110000 |
| H | 5.6682370000  | -2.5116120000 | 0.0000070000  |
| H | 7.9467360000  | -1.5724340000 | 0.0000090000  |
| H | 8.3069470000  | 0.8584720000  | 0.0000040000  |
| H | 6.3912910000  | 2.4199480000  | -0.0000020000 |
| H | 0.5134130000  | 2.4638440000  | 0.0000020000  |
| H | 3.6106050000  | 2.4699170000  | 0.0000000000  |
| H | -3.6106060000 | -2.4699170000 | 0.0000010000  |

### 3b; anti-IDBF

|                                              |                             |
|----------------------------------------------|-----------------------------|
| Zero-point correction=                       | 0.286703 (Hartree/Particle) |
| Thermal correction to Energy=                | 0.303596                    |
| Thermal correction to Enthalpy=              | 0.304540                    |
| Thermal correction to Gibbs Free Energy=     | 0.241856                    |
| Sum of electronic and zero-point Energies=   | -1071.739690                |
| Sum of electronic and thermal Energies=      | -1071.722797                |
| Sum of electronic and thermal Enthalpies=    | -1071.721853                |
| Sum of electronic and thermal Free Energies= | -1071.784537                |

|   |               |               |               |
|---|---------------|---------------|---------------|
| C | 1.3113000000  | -0.4362020000 | 0.0000040000  |
| C | 0.3208340000  | -1.3993990000 | 0.0000040000  |
| C | -1.0014150000 | -0.9757330000 | 0.0000020000  |
| C | -2.2160820000 | -1.7255430000 | 0.0000000000  |
| C | -3.2744010000 | -0.8123890000 | 0.0000000000  |
| C | -2.7293260000 | 0.4723430000  | 0.0000000000  |
| O | -3.6594700000 | 1.4407290000  | -0.0000010000 |
| C | -4.8768180000 | 0.7756990000  | -0.0000010000 |
| C | -4.7046990000 | -0.6165800000 | -0.0000010000 |
| C | -5.8343760000 | -1.4220090000 | -0.0000010000 |
| C | -7.0820140000 | -0.8208600000 | -0.0000010000 |
| C | -7.2166150000 | 0.5639960000  | -0.0000010000 |
| C | -6.1031000000 | 1.3918840000  | -0.0000010000 |
| C | -1.3113000000 | 0.4362020000  | -0.0000020000 |
| C | -0.3208340000 | 1.3993990000  | -0.0000030000 |
| C | 1.0014150000  | 0.9757330000  | 0.0000010000  |

|   |               |               |               |
|---|---------------|---------------|---------------|
| C | 2.2160820000  | 1.7255430000  | 0.0000070000  |
| C | 3.2744010000  | 0.8123890000  | 0.0000030000  |
| C | 2.7293260000  | -0.4723430000 | 0.0000020000  |
| O | 3.6594700000  | -1.4407290000 | 0.0000010000  |
| C | 4.8768180000  | -0.7756990000 | -0.0000010000 |
| C | 4.7046990000  | 0.6165800000  | 0.0000000000  |
| C | 5.8343760000  | 1.4220090000  | -0.0000010000 |
| C | 7.0820140000  | 0.8208600000  | -0.0000030000 |
| C | 7.2166150000  | -0.5639960000 | -0.0000040000 |
| C | 6.1031000000  | -1.3918840000 | -0.0000020000 |
| H | 0.5672560000  | -2.4539860000 | 0.0000050000  |
| H | -2.2791570000 | -2.8028980000 | 0.0000010000  |
| H | -5.7432140000 | -2.4996910000 | -0.0000010000 |
| H | -7.9700030000 | -1.4383430000 | -0.0000010000 |
| H | -8.2042080000 | 1.0043660000  | -0.0000010000 |
| H | -6.1885690000 | 2.4691440000  | -0.0000010000 |
| H | -0.5672560000 | 2.4539860000  | -0.0000030000 |
| H | 2.2791570000  | 2.8028980000  | 0.0000080000  |
| H | 5.7432140000  | 2.4996910000  | 0.0000000000  |
| H | 7.9700030000  | 1.4383420000  | -0.0000040000 |
| H | 8.2042080000  | -1.0043660000 | -0.0000050000 |
| H | 6.1885690000  | -2.4691440000 | -0.0000030000 |

### 3c; anti-IDBT

|                                              |                             |
|----------------------------------------------|-----------------------------|
| Zero-point correction=                       | 0.280886 (Hartree/Particle) |
| Thermal correction to Energy=                | 0.298988                    |
| Thermal correction to Enthalpy=              | 0.299932                    |
| Thermal correction to Gibbs Free Energy=     | 0.234313                    |
| Sum of electronic and zero-point Energies=   | -1717.753891                |
| Sum of electronic and thermal Energies=      | -1717.735788                |
| Sum of electronic and thermal Enthalpies=    | -1717.734844                |
| Sum of electronic and thermal Free Energies= | -1717.800464                |

|   |               |               |               |
|---|---------------|---------------|---------------|
| C | 1.3028240000  | -0.4958820000 | 0.0000000000  |
| C | 0.2897110000  | -1.4078170000 | 0.0000000000  |
| C | -1.0372740000 | -0.9295510000 | 0.0000010000  |
| C | -2.2522450000 | -1.6120380000 | 0.0000010000  |
| C | -3.3053580000 | -0.6516980000 | 0.0000000000  |
| C | -2.7424260000 | 0.6140950000  | 0.0000000000  |
| S | -3.8996540000 | 1.8744320000  | 0.0000000000  |
| C | -5.2072840000 | 0.7073160000  | 0.0000000000  |
| C | -4.7399820000 | -0.6205960000 | 0.0000000000  |
| C | -5.6710510000 | -1.6576680000 | 0.0000000000  |
| C | -7.0180700000 | -1.3655840000 | -0.0000010000 |
| C | -7.4631030000 | -0.0439630000 | -0.0000010000 |

|   |               |               |               |
|---|---------------|---------------|---------------|
| C | -6.5616660000 | 1.0012130000  | -0.0000010000 |
| C | -1.3028250000 | 0.4958820000  | 0.0000010000  |
| C | -0.2897120000 | 1.4078170000  | 0.0000010000  |
| C | 1.0372730000  | 0.9295510000  | 0.0000010000  |
| C | 2.2522440000  | 1.6120400000  | 0.0000000000  |
| C | 3.3053580000  | 0.6516980000  | 0.0000000000  |
| C | 2.7424250000  | -0.6140950000 | 0.0000000000  |
| S | 3.8996540000  | -1.8744320000 | 0.0000000000  |
| C | 5.2072840000  | -0.7073160000 | 0.0000000000  |
| C | 4.7399820000  | 0.6205960000  | 0.0000000000  |
| C | 5.6710520000  | 1.6576680000  | 0.0000000000  |
| C | 7.0180710000  | 1.3655840000  | -0.0000010000 |
| C | 7.4631030000  | 0.0439630000  | -0.0000010000 |
| C | 6.5616660000  | -1.0012130000 | -0.0000010000 |
| H | 0.4858200000  | -2.4733780000 | 0.0000000000  |
| H | -2.3686330000 | -2.6857470000 | 0.0000010000  |
| H | -5.3338090000 | -2.6859190000 | 0.0000000000  |
| H | -7.7406070000 | -2.1705850000 | -0.0000010000 |
| H | -8.5240690000 | 0.1655280000  | -0.0000010000 |
| H | -6.9056480000 | 2.0268600000  | -0.0000010000 |
| H | -0.4858200000 | 2.4733780000  | 0.0000010000  |
| H | 2.3686330000  | 2.6857500000  | 0.0000000000  |
| H | 5.3338090000  | 2.6859190000  | 0.0000000000  |
| H | 7.7406070000  | 2.1705840000  | -0.0000010000 |
| H | 8.5240690000  | -0.1655290000 | -0.0000010000 |
| H | 6.9056470000  | -2.0268610000 | -0.0000010000 |

### 3d; *syn*-IDI

|                                              |                             |
|----------------------------------------------|-----------------------------|
| Zero-point correction=                       | 0.313146 (Hartree/Particle) |
| Thermal correction to Energy=                | 0.330769                    |
| Thermal correction to Enthalpy=              | 0.331713                    |
| Thermal correction to Gibbs Free Energy=     | 0.267688                    |
| Sum of electronic and zero-point Energies=   | -1031.984466                |
| Sum of electronic and thermal Energies=      | -1031.966844                |
| Sum of electronic and thermal Enthalpies=    | -1031.965899                |
| Sum of electronic and thermal Free Energies= | -1032.029925                |

|   |               |               |               |
|---|---------------|---------------|---------------|
| N | -4.2706820000 | 1.9209040000  | 0.0000000000  |
| C | -5.0322400000 | 0.7680740000  | 0.0000010000  |
| C | -4.1570390000 | -0.3519770000 | 0.0000000000  |
| C | -4.7114430000 | -1.6336540000 | 0.0000010000  |
| C | -6.0811370000 | -1.7743750000 | 0.0000030000  |
| C | -6.9245300000 | -0.6570900000 | 0.0000040000  |
| C | -6.4117900000 | 0.6228680000  | 0.0000030000  |
| C | -2.8379110000 | 0.1858330000  | -0.0000030000 |

|   |               |               |               |
|---|---------------|---------------|---------------|
| C | -2.9530430000 | 1.5551890000  | -0.0000030000 |
| C | -1.6548930000 | 2.1874930000  | -0.0000020000 |
| C | -0.7279710000 | 1.1878670000  | -0.0000020000 |
| C | -1.4136820000 | -0.1192310000 | -0.0000030000 |
| C | -0.7068080000 | -1.2619600000 | -0.0000030000 |
| C | 0.7279710000  | -1.1878690000 | -0.0000020000 |
| C | 1.6548890000  | -2.1874950000 | -0.0000020000 |
| C | 2.9530410000  | -1.5551880000 | -0.0000020000 |
| C | 2.8379090000  | -0.1858310000 | -0.0000020000 |
| C | 4.1570360000  | 0.3519800000  | 0.0000000000  |
| C | 4.7114490000  | 1.6336550000  | 0.0000020000  |
| C | 6.0811440000  | 1.7743710000  | 0.0000040000  |
| C | 6.9245350000  | 0.6570870000  | 0.0000050000  |
| C | 6.4117870000  | -0.6228700000 | 0.0000040000  |
| C | 5.0322390000  | -0.7680680000 | 0.0000020000  |
| N | 4.2706770000  | -1.9209010000 | 0.0000010000  |
| C | 1.4136840000  | 0.1192310000  | -0.0000020000 |
| C | 0.7068070000  | 1.2619580000  | -0.0000020000 |
| H | -4.0716700000 | -2.5060610000 | 0.0000000000  |
| H | -6.5172690000 | -2.7643050000 | 0.0000040000  |
| H | -7.9965670000 | -0.8004620000 | 0.0000050000  |
| H | -7.0660860000 | 1.4852120000  | 0.0000040000  |
| H | -1.4494550000 | 3.2474560000  | -0.0000020000 |
| H | -1.1905880000 | -2.2309860000 | -0.0000030000 |
| H | 1.4494540000  | -3.2474580000 | -0.0000020000 |
| H | 4.0716830000  | 2.5060690000  | 0.0000010000  |
| H | 6.5172750000  | 2.7643030000  | 0.0000050000  |
| H | 7.9965730000  | 0.8004570000  | 0.0000070000  |
| H | 7.0660730000  | -1.4852210000 | 0.0000050000  |
| H | 1.1905860000  | 2.2309840000  | -0.0000030000 |
| H | 4.6350050000  | -2.8551920000 | -0.0000020000 |
| H | -4.6349990000 | 2.8552010000  | -0.0000020000 |

### 3e; *syn*-IDBF

|                                              |                             |
|----------------------------------------------|-----------------------------|
| Zero-point correction=                       | 0.288934 (Hartree/Particle) |
| Thermal correction to Energy=                | 0.305586                    |
| Thermal correction to Enthalpy=              | 0.306530                    |
| Thermal correction to Gibbs Free Energy=     | 0.244339                    |
| Sum of electronic and zero-point Energies=   | -1071.769607                |
| Sum of electronic and thermal Energies=      | -1071.752956                |
| Sum of electronic and thermal Enthalpies=    | -1071.752011                |
| Sum of electronic and thermal Free Energies= | -1071.814202                |

|   |              |              |              |
|---|--------------|--------------|--------------|
| C | 1.3736390000 | 0.3008620000 | 0.0000000000 |
| C | 0.5306380000 | 1.3450940000 | 0.0000000000 |

|   |               |               |               |
|---|---------------|---------------|---------------|
| C | -0.8821420000 | 1.0817290000  | 0.0000000000  |
| C | -1.9399740000 | 1.9285130000  | 0.0000000000  |
| C | -3.1761060000 | 1.1617860000  | 0.0000000000  |
| C | -2.8375040000 | -0.2216980000 | 0.0000000000  |
| C | -3.7987960000 | -1.2004560000 | 0.0000000000  |
| C | -5.1356880000 | -0.7886270000 | 0.0000000000  |
| C | -6.4076090000 | -1.4588690000 | 0.0000000000  |
| C | -7.3397330000 | -0.4907280000 | -0.0000010000 |
| O | -6.7849160000 | 0.7547210000  | 0.0000000000  |
| C | -5.4370480000 | 0.5751790000  | 0.0000000000  |
| C | -4.4893030000 | 1.5842080000  | 0.0000000000  |
| C | -1.3736390000 | -0.3008620000 | 0.0000000000  |
| C | -0.5306380000 | -1.3450940000 | 0.0000000000  |
| C | 0.8821420000  | -1.0817290000 | 0.0000000000  |
| C | 1.9399740000  | -1.9285130000 | 0.0000000000  |
| C | 3.1761060000  | -1.1617860000 | 0.0000000000  |
| C | 2.8375040000  | 0.2216980000  | 0.0000000000  |
| C | 3.7987960000  | 1.2004560000  | 0.0000000000  |
| C | 5.1356880000  | 0.7886270000  | 0.0000000000  |
| C | 6.4076090000  | 1.4588690000  | 0.0000000000  |
| C | 7.3397330000  | 0.4907280000  | -0.0000010000 |
| O | 6.7849160000  | -0.7547210000 | 0.0000000000  |
| C | 5.4370480000  | -0.5751790000 | 0.0000000000  |
| C | 4.4893030000  | -1.5842080000 | 0.0000000000  |
| H | 0.8853640000  | 2.3686310000  | 0.0000000000  |
| H | -1.8886310000 | 3.0078470000  | 0.0000000000  |
| H | -3.5398440000 | -2.2513890000 | 0.0000000000  |
| H | -6.5928770000 | -2.5193720000 | 0.0000000000  |
| H | -8.4152630000 | -0.5179650000 | -0.0000020000 |
| H | -4.7710330000 | 2.6279070000  | 0.0000000000  |
| H | -0.8853640000 | -2.3686310000 | 0.0000000000  |
| H | 1.8886310000  | -3.0078470000 | 0.0000000000  |
| H | 3.5398440000  | 2.2513890000  | 0.0000000000  |
| H | 6.5928770000  | 2.5193720000  | 0.0000000000  |
| H | 8.4152630000  | 0.5179650000  | -0.0000010000 |
| H | 4.7710330000  | -2.6279070000 | 0.0000000000  |

### 3f; *syn*-IDBT

|                                            |                             |
|--------------------------------------------|-----------------------------|
| Zero-point correction=                     | 0.282945 (Hartree/Particle) |
| Thermal correction to Energy=              | 0.300874                    |
| Thermal correction to Enthalpy=            | 0.301818                    |
| Thermal correction to Gibbs Free Energy=   | 0.236420                    |
| Sum of electronic and zero-point Energies= | -1717.751036                |
| Sum of electronic and thermal Energies=    | -1717.733108                |
| Sum of electronic and thermal Enthalpies=  | -1717.732164                |



Sum of electronic and thermal Free Energies= -1717.797562

|   |               |               |               |
|---|---------------|---------------|---------------|
| C | 1.4092970000  | 0.1076220000  | -0.0000020000 |
| C | 0.7101360000  | 1.2581970000  | -0.0000030000 |
| C | -0.7216940000 | 1.1887020000  | -0.0000020000 |
| C | -1.6524180000 | 2.1858500000  | -0.0000020000 |
| C | -2.9549700000 | 1.5652760000  | -0.0000020000 |
| C | -2.8349820000 | 0.1982510000  | -0.0000010000 |
| C | -4.0937860000 | -0.4715090000 | 0.0000010000  |
| C | -4.4046620000 | -1.8346750000 | 0.0000030000  |
| C | -5.7204420000 | -2.2346490000 | 0.0000050000  |
| C | -6.7551250000 | -1.2954440000 | 0.0000050000  |
| C | -6.4793740000 | 0.0544870000  | 0.0000030000  |
| C | -5.1526100000 | 0.4631460000  | 0.0000010000  |
| S | -4.5864580000 | 2.1121910000  | -0.0000030000 |
| C | -1.4092970000 | -0.1076220000 | -0.0000020000 |
| C | -0.7101360000 | -1.2581970000 | -0.0000020000 |
| C | 0.7216940000  | -1.1887020000 | -0.0000020000 |
| C | 1.6524180000  | -2.1858500000 | -0.0000020000 |
| C | 2.9549700000  | -1.5652760000 | -0.0000030000 |
| C | 2.8349820000  | -0.1982510000 | -0.0000020000 |
| C | 4.0937860000  | 0.4715090000  | 0.0000010000  |
| C | 4.4046620000  | 1.8346750000  | 0.0000030000  |
| C | 5.7204410000  | 2.2346490000  | 0.0000050000  |
| C | 6.7551250000  | 1.2954440000  | 0.0000050000  |
| C | 6.4793740000  | -0.0544870000 | 0.0000030000  |
| C | 5.1526100000  | -0.4631460000 | 0.0000010000  |
| S | 4.5864580000  | -2.1121910000 | -0.0000030000 |
| H | 1.1958310000  | 2.2256750000  | -0.0000030000 |
| H | -1.4534860000 | 3.2467830000  | -0.0000020000 |
| H | -3.6121830000 | -2.5703400000 | 0.0000040000  |
| H | -5.9599790000 | -3.2894710000 | 0.0000070000  |
| H | -7.7832650000 | -1.6309160000 | 0.0000060000  |
| H | -7.2803860000 | 0.7815570000  | 0.0000020000  |
| H | -1.1958310000 | -2.2256750000 | -0.0000020000 |
| H | 1.4534860000  | -3.2467830000 | -0.0000030000 |
| H | 3.6121830000  | 2.5703390000  | 0.0000030000  |
| H | 5.9599790000  | 3.2894710000  | 0.0000070000  |
| H | 7.7832650000  | 1.6309160000  | 0.0000070000  |
| H | 7.2803860000  | -0.7815570000 | 0.0000030000  |

## 6. References

1. M. J. Frisch, G. W. Trucks, H. B. Schlegel, G. E. Scuseria, M. A. Robb, J. R. Cheeseman, G. Scalmani, V. Barone, G. A. Petersson, H. Nakatsuji, X. Li, M. Caricato, A. Marenich, J. Bloino, B. G. Janesko, R. Gomperts, B. Mennucci, H. P. Hratchian, J. V. Ortiz, J. V. Izmaylov, J. L. Sonnenberg, D. Williams-Young, F. Ding, F. Lipparini, F. Egidi, J. Goings, B. Peng, A. Petrone, T. Henderson, D. Ranasinghe, V. G. Zakrzewski, J. Gao, N. Rega, G. Zheng, W. Liang, M. Hada, M. Ehara, K. Toyota, R. Fukuda, J. Hasegawa, M. Ishida, T. Nakajima, Y. Honda, O. Kitao, H. Nakai, T. Vreven, T. Throssell, J. A. Jr. Montgomery, J. E. Peralta, F. Ogliaro, M. Bearpark, J. J. Heyd, E. Brother, K. N. Kudin, V. N. Staroverov, T. Keith, R. Kobayashi, J. Normand, K. Raghavachari, A. Rendell, J. C. Burant, S. S. Iyengar, J. Tomasi, M. Cossi, J. M. Millam, M. Klene, C. Adamo, R. Cammi, J. W. Ochterski, R. L. Martin, K. Morokuma, O. Farkas, J. B. Foresman and D. J. Fox, Gaussian 09, Revision E.01 (version A.1.).
2. Modeling Antiferromagnetic Coupling in Gaussian, <https://gaussian.com/afc/>.
3. A. Stanger, *J. Org. Chem.*, 2006, **71**, 883–893.
4. A. Stanger, *J. Org. Chem.*, 2010, **75**, 2281–2288.
5. R. Gershoni-Poranne and A. Stanger, *Chem. Eur. J.*, 2014, **20**, 5673–5688.
6. E. Paenurk and R. Gershoni-Poranne, *Phys. Chem. Chem. Phys.*, 2022, **24**, 8631–8644.
7. G. Monaco, F. F. Summa and R. Zanasi, *J. Chem. Inf. Model.*, 2021, **61**, 270–283.
8. M. J. Frisch, G. W. Trucks, H. B. Schlegel, G. E. Scuseria, M. A. Robb, J. R. Cheeseman, G. Scalmani, V. Barone, G. A. Petersson, H. Nakatsuji, X. Li, M. Caricato, A. Marenich, J. Bloino, B. G. Janesko, R. Gomperts, B. Mennucci, H. P. Hratchian, J. V. Ortiz, J. V. Izmaylov, J. L. Sonnenberg, D. Williams-Young, F. Ding, F. Lipparini, F. Egidi, J. Goings, B. Peng, A. Petrone, T. Henderson, D. Ranasinghe, V. G. Zakrzewski, J. Gao, N. Rega, G. Zheng, W. Liang, M. Hada, M. Ehara, K. Toyota, R. Fukuda, J. Hasegawa, M. Ishida, T. Nakajima, Y. Honda, O. Kitao, H. Nakai, T. Vreven, T. Throssell, J. A. Jr. Montgomery, J. E. Peralta, F. Ogliaro, M. Bearpark, J. J. Heyd, E. Brother, K. N. Kudin, V. N. Staroverov, T. Keith, R. Kobayashi, J. Normand, K. Raghavachari, A. Rendell, J. C. Burant, S. S. Iyengar, J. Tomasi, M. Cossi, J. M. Millam, M. Klene, C. Adamo, R. Cammi, J. W. Ochterski, R. L. Martin, K. Morokuma, O. Farkas, J. B. Foresman and D. J. Fox, Gaussian 16, Revision C.01.
9. C. Hansch, A. Leo and R. W. Taft, *Chem. Rev.*, 1991, **91**, 165–195.
